# Supplementary material
Source: MDPI journal article supplement (https://www.mdpi.com/2504-477X/6/12/385)
Supplement: s1 [file s1]

## Supplementary materials

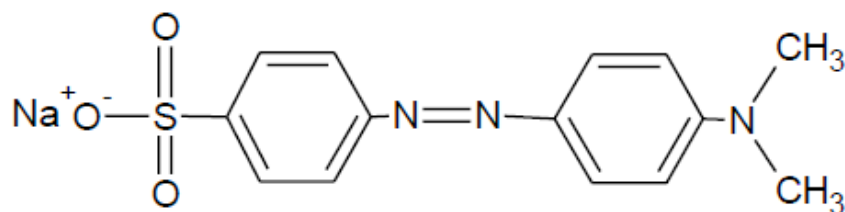

**Figure S1.** Methyl orange dye MeO chemical structure.

**Table S1.** Methyl orange dye MeO physicochemical characteristics.

|                                               |                                                                                            |
|-----------------------------------------------|--------------------------------------------------------------------------------------------|
| Chemical Name                                 | Acide 4-, benzène sulfonique (forme acide) 4-, benzène sulfonate de sodium (sel de sodium) |
| CAS Number                                    | 547-58-0                                                                                   |
| Color Index (C.I.)                            | C.I. Acid Orange 52                                                                        |
| Chemical Formula                              | C <sub>14</sub> H <sub>14</sub> N <sub>3</sub> O <sub>3</sub> Na                           |
| Molecular weight (g·mol <sup>-1</sup> )       | 327.33                                                                                     |
| $\lambda_{\text{max}}$ (nm)                   | 463                                                                                        |
| Water solubility at 20°C (g·L <sup>-1</sup> ) | 5.20                                                                                       |
| Molecular size c(Å <sup>3</sup> )             | 14.38 × 6.56 × 4.04                                                                        |

**Table S2.** Textural properties obtained by N<sub>2</sub> adsorption/desorption studies on biochar MO<sub>C-ZnCl2</sub> and commercial activated carbon.

| Property                                     | Activated carbon       |                           |
|----------------------------------------------|------------------------|---------------------------|
|                                              | MO C-ZnCl <sub>2</sub> | CA Commercial (7440-44-0) |
| Pore size (nm)                               | ≈2.00                  | ≈18.09                    |
| S <sub>BET</sub> (m <sup>2</sup> /g)         | 699.69                 | 812.14                    |
| S <sub> Micropores</sub> (m <sup>2</sup> /g) | 601.99                 | 219.33                    |
| S <sub> Ext</sub> (m <sup>2</sup> /g)        | 97.69                  | 592.81                    |
| % S <sub> Micropores</sub>                   | 86.03                  | 27.00                     |
| % S <sub> Ext</sub>                          | 13.96                  | 72.99                     |
